# Supplementary material for: Asgard archaea defense systems and their roles in the origin of eukaryotic immunity
Source: PubMed Central journal article supplement (PMC11291487; doi:10.1038/s41467-024-50195-2), 2024-07-31
Supplement: 41467_2024_50195_MOESM3_ESM.pdf [file 41467_2024_50195_MOESM3_ESM.pdf]

## **Description of Additional Supplementary Files**

**File Name: Supplementary Data 1**

**Description:** DefenseFinder output, and descriptive statistics of each dataset analyzed in this work.

**File Name: Supplementary Data 2**

**Description:** Information regarding the asVip expression experiment.

**File Name: Supplementary Data 3**

**Description:** General information and alignments of the protein structures analysed in this work.

**File Name: Supplementary Data 4**

**Description:** Mapping files of the phylogenetic trees.

**File Name: Supplementary Data 5**

**Description:** Sequence and structural alignments used to generate the data.
